RESEARCH ARTICLE

# *Thymus mastichina* L. essential oils from Murcia (Spain): Composition and antioxidant, antienzymatic and antimicrobial bioactivities

Ana-Belen Cutillas<sup>1\*</sup>, Alejandro Carrasco<sup>1</sup>, Ramiro Martinez-Gutierrez<sup>2</sup>, Virginia Tomas<sup>3</sup>, Jose Tudela<sup>1</sup>

**1** GENZ-Group of research on Enzymology, Department of Biochemistry and Molecular Biology-A, Regional Campus of International Excellence "Campus Mare Nostrum", University of Murcia, Murcia, Spain, **2** Novozymes Spain S.A., Madrid, Spain, **3** Department of Analytical Chemistry, University of Murcia, Murcia, Spain

\* [anabelen.cutillas@um.es](mailto:anabelen.cutillas@um.es)

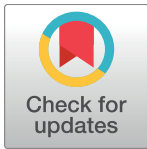

**OPEN ACCESS**

**Citation:** Cutillas A-B, Carrasco A, Martinez-Gutierrez R, Tomas V, Tudela J (2018) *Thymus mastichina* L. essential oils from Murcia (Spain): Composition and antioxidant, antienzymatic and antimicrobial bioactivities. PLoS ONE 13(1): e0190790. <https://doi.org/10.1371/journal.pone.0190790>

**Editor:** Gabriel Agbor, Institute of medical research and medicinal plant studies, CAMEROON

**Received:** June 16, 2017

**Accepted:** December 20, 2017

**Published:** January 5, 2018

**Copyright:** © 2018 Cutillas et al. This is an open access article distributed under the terms of the [Creative Commons Attribution License](https://creativecommons.org/licenses/by/4.0/), which permits unrestricted use, distribution, and reproduction in any medium, provided the original author and source are credited.

**Data Availability Statement:** All relevant data are within the paper and its Supporting Information files.

**Funding:** This work was partially supported by Spanish organizations: Projects 19545/PI/14 (Fundacion Seneca, CARM, Murcia, Spain, [www.fsenedca.es](http://www.fsenedca.es)[1]), UMU-15452 and UMU-17766 (Universidad de Murcia, Murcia, Spain, [www.um.es](http://www.um.es)[2]) awarded to JT. ABC has a predoctoral contract from Spanish Ministry of Education,

## Abstract

The compositions of essential oils (EOs) from Spanish marjoram (*Thymus mastichina* L.) grown in several bioclimatic zones of Murcia (SE Spain) were studied to determine their absolute and relative concentrations using gas chromatography-mass spectrometry. 1,8-Cineole and linalool were the main components, followed by  $\alpha$ -pinene,  $\beta$ -pinene and  $\alpha$ -terpineol. (–)-Linalool, (+)- $\alpha$ -terpineol and (+)- $\alpha$ -pinene were the most abundant enantiomers. When the antioxidant capacities of *T. mastichina* EOs and their compounds were measured by five methods, EOs and linalool, linalyl acetate,  $\alpha$ -terpinene and  $\gamma$ -terpinene, among others, showed antioxidant activities. All four *T. mastichina* EOs inhibited both lipoxygenase and acetylcholinesterase activities, and they might be useful for further research into inflammatory and Alzheimer diseases. Bornyl acetate and limonene showed the highest lipoxygenase inhibition and 1,8-cineole was the best acetylcholinesterase inhibitor. Moreover, these EOs inhibited the growth of *Escherichia coli*, *Staphylococcus aureus* and *Candida albicans* due to the contribution of their individual compounds. The results underline the potential use of these EOs in manufactured products, such as foodstuff, cosmetics and pharmaceuticals.

## Introduction

*Thymus mastichina* L., an endemic species of the Iberian Peninsula, is commonly known as Spanish marjoram. It belongs to the *Lamiaceae* family, with leaves arranged in opposite pairs and small zygomorphic and bilabiate flowers [1]. It is an aromatic plant, whose essential oil (EO) consists of a complex mixture of volatile terpenes. Its chemical composition depends on the plant species, culture and environmental conditions [2]. Previous studies from Portugal and other regions of Spain have reported the composition of *T. mastichina* EOs (TmEOs) in the form of the relative concentrations of their volatile compounds [2–11]. However, the absolute concentrations of these compounds have not been determined [2–11], although this

Culture and Sport [FPU13/04013]. The funders had no role in study design, data collection and analysis, decision to publish, or preparation of the manuscript. The specific roles of these authors are articulated in the 'author contributions' section. Ramiro Martinez-Gutierrez employed at the company Novozymes Spain S.A. provided resources and software assistance.

**Competing interests:** The authors have declared that no competing interests exist. Ramiro Martinez-Gutierrez employed at the company Novozymes Spain S.A. provided resources and software assistance. His affiliation does not alter our adherence to PLOS ONE policies on sharing data and materials.

information would be useful for applications that require knowing the exact quantity of each compound and for detecting solvent dilutions in commercial EOs. Moreover, no chiral characterization of above mentioned TmEOs has been reported [2–11]. However, such data are important for quality assurance, since they help to assess either the genuineness or possible adulteration of the EOs, as well as their origin [12]. Furthermore, the information is required to use TmEOs as a natural source of pure enantiomers [13].

Oxidative processes are involved in several human diseases, such as cancer, atherosclerosis and rheumatoid arthritis [14–18]. In the case of food products, oxidation and microorganism growth are the main cause of food spoilage and foodborne illnesses. Synthetic preservatives are widely used to combat such threats, but their use is continually in the spotlight due to their questionable safety [4]. For this reason, natural preservatives are being actively sought and, in this context, several plant EOs have been reported as being natural antioxidants and antimicrobials [19–23].

Lipoxygenase (LOX) is an enzyme related to inflammatory processes. It oxidizes unsaturated fatty acids with a cis, cis-1,4-pentadiene structure producing conjugated unsaturated fatty acid hydroperoxides and leukotrienes [24]. Its inhibition leads to the reduction of the inflammatory/allergic response, and tumoral and Alzheimer's disorders [24–26]. Acetylcholinesterase (AChE) is an enzyme that hydrolyses the acetylcholine and other choline esters that function as neurotransmitters in chemical synapses. Their inhibitors increase the neurotransmitter action, and so they are used as insecticides [27] and in the treatment of cancer [28] and Alzheimer's disease [29, 30]. Some studies about TmEO from Portugal reported the inhibition of LOX and AChE [31, 32].

The objective of this work was to make a thorough characterization of TmEOs from Murcia (south-eastern Spain) for the first time, in order to assess possible biotechnological applications of the same. Absolute and relative concentrations of the volatile compounds of these TmEOs were determined using gas chromatography with mass spectrometry detector (GC-MS). This method, with an enantioselective column (EsGC-MS), was used to determine the proportions of the relevant chiral compounds of these TmEOs for the first time in this species. Important bioactivities were studied for these TmEOs, and their main commercially available pure compounds. For this, five complementary methods were applied to evaluate the antioxidant capacity. The inhibition of LOX and AChE was also reported. The antimicrobial effect of these TmEOs and their main relevant biomolecules against *Pseudomonas aeruginosa*, *Escherichia coli*, *Staphylococcus aureus* and *Candida albicans* was studied. Composition-bioactivity relationships between these EOs from Spanish marjoram and their main volatile compounds were established and possible biotechnological applications are proposed.

## Materials and methods

### Plant material

TmEOs were obtained from aerial parts of the cultivated plants grown in Murcia (Spain), collected during the flowering phase (July 2014). The cultivated plants were collected in the farm of Esencias Martinez Lozano S.A. We confirm that the owner of the land gave permission to conduct the study on his farm. Three plant samples for each harvested locality, during the same day, were collected, mixed and ground with a hammer mill to obtain a uniform mixture of plant powder ( $\leq 1$  mm particle size). Then, three hydrodistillation processes were carried out, using 300 g of plant powder in a Clevenger-type apparatus for 3 hours, after collection to avoid the loss and/or the breakdown of volatile biomolecules. EOs were dried over anhydrous sodium sulfate and stored at 4°C until use. TmEO-1 and -3 were obtained from plants grown in the Upper Meso-Mediterranean bioclimatic zone (Caravaca de la Cruz), TmEO-2 from

plants grown in Lower Meso-Mediterranean bioclimatic zone (Lorca) and TmEO-4 from plants grown in Supra-Mediterranean bioclimatic zone (Moratalla) [33]. Plant species were identified in the Plant Biology Department of Murcia University by Dr. Pedro Sanchez-Gomez. The voucher specimens are stored in the Department of Biochemistry and Molecular Biology-A (BMBA160620, BMBA160621, BMBA160622, BMBA160623 for TmEO-1, -2, -3 and -4, respectively).

### Reagents and solvents

The chemical compounds used for the antioxidant assays, the reagents for the LOX and AChE inhibition assays and reference antibacterial and antifungal compounds were purchased from Sigma-Aldrich Spain. All compounds were of analytical grade (purity higher than 95%). All culture media were acquired from VWR Chemicals Spain: Mueller-Hinton agar (MHA), Mueller-Hinton broth (MHB), Roswell Park Memorial Institute medium (RPMI-1640), Sabouraud dextrose agar (SDA), tryptic soy broth (TSB) and yeast peptone dextrose (YPD).

Solvents of analytic grade and buffers were purchased from Merck (Madrid, Spain). Type I (18 M $\Omega$  cm) deionized water (MilliQ-Reference, Millipore, Madrid, Spain) was used in this work.

### Fast gas chromatography mass-spectrometry (FGC-MS)

The analyses of TmEOs were performed using an Agilent GC7890 chromatograph, coupled with an Agilent MS5975 mass spectrometer detector with electronic impact ionization and single quadrupole. The sandwich injections (0.2  $\mu$ L air, 0.2  $\mu$ L iso-octane, 0.2  $\mu$ L air, 0.3  $\mu$ L sample and 0.2  $\mu$ L air, described from plunger to needle) were made using a Gerstel automatic multi-purpose sampler MPS-2XT. The chromatography was performed in a low bleed capillary fused-silica column, SLB-5ms from Supelco (15 m length x 0.1 mm internal diameter x 0.1  $\mu$ m film thickness) with hydrogen as carrier gas (0.8 mL/min) which generates a head pressure of 46.345 psi. This carrier gas was produced with an electrolytic Parker-Domnik-Hunter generator.

The injection conditions were as follows: septum purge 3 mL/min, split ratio 100:1 and injector temperature 300°C. GC oven temperature was kept at 60°C and programmed to raise up to 300°C as follows: to 92°C at a rate 15°C/min, to 96°C at a rate of 1°C/min, to 108°C at a rate of 20°C/min and kept constant for 0.5 min, to 120°C at a rate of 5°C/min, to 160°C at a rate of 20°C/min, to 170°C at a rate of 5°C/min and to 300°C at a rate of 30°C/min, kept constant at 300°C for 0.5 min.

MS was adjusted to the following conditions: electron ionization energy 70 eV, electron-multiplier voltage 1129, acquisition mass range 30–300 m/z, 21,035 scans·s<sup>-1</sup>, transfer line temperature 280°C, ion source temperature 230°C, MS quadrupole temperature 150°C.

Compounds were identified by comparison of their retention times and the mass spectra of commercially available pure standards (S1 Fig) and the NIST 08 and Wiley 7 spectral databases. The TmEO-1 chromatogram is shown in the S2 Fig with the major compounds identified. The quantitative determination was made by means of calibration curves of each commercially available component described in the TmEOs (S1 Table).

### Enantioselective gas chromatography-mass spectrometry (EsGC-MS)

An Astec ChiralDEX B-DM column (30 m length x 0.25 mm internal diameter x 0.12  $\mu$ m film thickness) from Supelco, made of dimethyl, 2,3-di-O-methyl-6-t-butyl silyl  $\beta$ -cyclodextrin, non-bonded to fused silica column, was installed in the previously described device. The injections were similar to the one previously described but, in this case, 0.5  $\mu$ L of sample was

injected. The injector and transfer line temperatures were 200°C. The column temperature was programmed to increase from 35°C to 170°C at a rate of 4°C/min and decrease to 35°C at a rate of 15°C/min. Hydrogen was used as carrier gas (constant flow of 2.5 mL/min, 8 psi starting column head pressure).

To identify both enantiomers, the retention times and the mass spectra of commercially available pure standards were compared with those of the TmEO compounds, and confirmed with the NIST and Wiley spectral data bases. The chromatogram obtained with TmEO-2 is shown in [S3 Fig](#).

## Antioxidant capacity

Five antioxidant methods were performed with TmEOs and their main individual compounds in triplicate, because the antioxidant activity may occur via scavenging different radicals and chelating metal ions [6, 7, 34]. All measurements were made at the end-point of the reaction, except in the ORAC method where kinetic measures were carried out ([S4 Fig](#)). The oxygen radical absorbance capacity (ORAC) assay was carried out as described by Ou, Hampsch-Woodill [35] to measure the activity of TmEOs and compounds against peroxy radical (ROO·). The results were expressed in trolox equivalent antioxidant capacity (TEAC) units (mg trolox equivalent (TE)/g TmEO). The 2,2'-azino-bis(3-ethylbenzothiazoline-6-sulphonic acid) (ABTS) antioxidant method measures the scavenging ability against ABTS radical cation (ABTS<sup>·+</sup>) [36] reported using TEAC units (mg TE/g TmEO). The 2,2-diphenyl-1-picrylhydrazyl (DPPH) method [37] uses the stable free radical DPPH to measure the scavenging capacity of antioxidants towards it, and the results are given in TEAC units (mg TE/kg TmEO). Both ABTS (strong oxidant) and DPPH (weak oxidant) are nitrogen radicals broadly used to determine the antioxidant capacity. The thiobarbituric acid reactive substances (TBARS) method was used to measure the potential antioxidant capacity of TmEOs by decreasing the oxidation of polyunsaturated fatty acids, using soybean lecithin homogenate as lipid-rich media [38]. The results were expressed in mg butylhydroxytoluene equivalents (BHTE)/g TmEO. The chelating power (ChP) method measured the ability of the tested TmEOs to chelate Fe<sup>2+</sup> ion, following the method of Miguel, Cruz [39]. Ethylenediaminetetraacetic acid (EDTA) was used as positive control and the results were expressed in mg EDTA equivalents (EDTAE)/g TmEO.

## Enzyme inhibition activity

A lipoxidase preparation from *Glycine max* (soybean) (LOX) was acquired from Sigma-Aldrich Spain. LOX inhibitory activity was determined as previously reported [40]. This assay was carried out on a double beam PerkinElmer Lambda 35 spectrophotometer with the UV-Winlab software, at 25°C. This method measures the absorption at 234 nm of the hydroperoxyde conjugated dienes ( $\epsilon_{234} = 25000 \text{ M}^{-1} \text{ cm}^{-1}$ ), which are generated from the oxidation of linoleic acid in the presence of oxygen and LOX. Nordihydroguaiaretic acid was used as standard inhibitor.

Cholinesterase acetyl type VI-S (AChE) from *Electrophorus electricus* was purchased from Sigma-Aldrich Spain. AChE inhibitory activity was measured according to Ellman's method [41]. AChE hydrolyzes acetylthiocholine to acetate and thiocholine, which reacts with 5,5'-Dithiobis(2-nitrobenzoic acid) (DTNB) producing a coloured compound with absorbance at 412 nm. The reaction was measured for 10 min at 25°C, using a 96-well microplate reader. Galantamine hydrobromide was used as reference inhibitor.

In these antienzymatic assays, the degree of inhibition (DI) was calculated using Eq 1:

$$DI(\%) = \frac{v_0 - v_i}{v_0} \times 100 \quad (1)$$

where  $v_0$  and  $v_i$  are the steady state rates in the absence and presence of inhibitor, respectively. The inhibitions of LOX were reported as DI at 150  $\mu\text{g/mL}$ , which is the maximum concentration of TmEO that could be used due to its limit of solubility. However, AChE inhibition could be expressed as  $IC_{50}$ . To calculate the  $IC_{50}$  values, data of DI (%) of seven different concentrations were plotted and fitted by non-linear regression according to Eq 2 using Sigma Plot software [42] (S5 Fig).

$$DI(\%) = \frac{DImax [I]_0}{IC_{50} + [I]_0} \quad (2)$$

All TmEOs and their compounds were analyzed in triplicate. The inhibition of individual compounds was expressed as  $IC_{50}$  or DI, depending on their inhibition capacities and solubilities.

## Antimicrobial activity

**Microorganisms and culture conditions.** The following test microorganisms used in this work were acquired from Sigma-Aldrich: *P. aeruginosa* ATCC 9027, *E. coli* ATCC 8739, *S. aureus* ATCC 6538 and *C. albicans* ATCC 10231. The stock cultures were preserved in TSB or YPD with 15% glycerol, for bacteria and yeast cells, respectively, at  $-80^\circ\text{C}$ .

**Determination of minimum inhibitory concentrations (MIC) and minimum bactericidal (MBC) or fungicidal (MFC) concentrations.** MIC were determined using the microdilution method, according to the M07-A10 [43] standard for bacteria and the M27-A3 [44] for *Candida*. Two-fold dilutions of TmEOs were prepared to obtain a final concentration range of 0.2–18.8  $\text{mg/mL}$  with 0.5% Tween<sup>®</sup> 80 and 2.5% DMSO. Most compounds were also tested to evaluate their antimicrobial activity in the concentration range of 0.12–15  $\text{mmol/L}$ . The final strain concentration was  $5 \times 10^5$  CFU/mL in MHB for bacteria and  $0.5\text{--}2.5 \times 10^3$  in RPMI-1640 for yeast. These plates were incubated for 24 h for bacteria and 48 h for the yeast, both at  $35 \pm 1^\circ\text{C}$ , under aerobic conditions on a plate shaker at 100 rpm. Streptomycin (0.06–8  $\mu\text{g/mL}$ ) and fluconazole (0.13–16  $\mu\text{g/mL}$ ) were used as reference antibacterial and antifungal compound, respectively. The negative and positive controls were made to test that all solutions were sterile and that 0.5% Tween<sup>®</sup> 80 and 2.5% DMSO, used for emulsifying the TmEOs, did not show any antibacterial activity. MIC was defined as the lowest concentration of EO with no visible growth of microorganisms, at the end of the incubation period. Then, 100  $\mu\text{L}$  of each well without growth in the MIC assay were spread on MHA (bacteria) or SDA (yeast) and incubated for 24 h at  $35 \pm 1^\circ\text{C}$  to determinate the MBC or MFC. The MBC or MFC was defined as the lowest EO concentration in which microorganisms failed to grow in broth and on agar. All determinations were carried out in triplicate.

## Statistical analysis

The statistical analyses of data were made using both univariate and multivariate methods [45]. Data were recorded as mean  $\pm$  standard deviation (SD) of at least triplicate determinations. Data values of 0.0 in the tables mean values lower than 0.05 units. Data quality was analyzed by ANOVA and means were confronted using Tukey's (HSD) test, considering differences to be significant at  $p < 0.05$ , represented by different letters next to numerical values



in tables. To determine similarity between TmEOs, Principal Component Analysis (PCA) and agglomerative hierarchical clustering (AHC) based on Euclidean distance were performed. Statistical analyses were conducted using Statistica software (software.dell.com).

## Results and discussion

### FGC-MS study

**Experimental data.** The obtained yields of the TmEO distillation process ranged from 1.8 to 2.6% (v/w). All the identified compounds are detailed in Table 1, where the composition is expressed as percentage of the total area (> 98%) for all compounds, and absolute concentration for commercially available compounds (> 95%). The two major compounds in these TmEOs are 1,8-cineole and linalool, with concentrations that varied from 38.8 to 74.0% for 1,8-cineole and from 2.2 to 42.7% for linalool. 1,8-Cineole was the major compound in TmEO-1, -2 and -3, whereas TmEO-4 had linalool as the most abundant compound.  $\alpha$ -Pinene,  $\beta$ -pinene and  $\alpha$ -terpineol were also present in relatively high concentrations. Oxygenated monoterpenes were the major group, mainly due to the high concentrations of 1,8-cineole and linalool, as reported in studies from other countries [2, 5–9, 11].

**Multivariate statistic PCA.** The PCA is based on the covariance matrix between linear combinations of the experimental variables (Table 1) and provides information about the qualitative similarities between EOs (Fig 1) and their characteristic compounds (Fig 2).

The first (PC1), second (PC2) and third (PC3) principal components account for 64.3%, 25.21% and 10.06% of whole variance, respectively. Thus, the cumulative proportion of total variance of these principal components is 100%.

The score plot of PC2 vs. PC1 (Fig 1A) shows three clusters: (1) TmEO-1 and -3; (2) TmEO-2; (3) TmEO-4. TmEO-1 and -3 show higher differences when the PC3 is represented vs. PC2 and PC1 (Fig 1B).

**Multivariate statistic AHC.** The dendrogram (Fig 3) represents the agglomerative hierarchical clustering based on Euclidean distance, showing that TmEO-1 and -3 are the most similar (85.2% similarity), clearly different from TmEO-2 (69.0% similarity) and TmEO-4 (44.9% similarity). The consideration of the whole compounds of TmEOs provides quantitative data of similarities between TmEOs, allowing us to identify three clusters (similar to the preliminary estimations in the PCA analysis).

**Comparison with other regions and countries.** To our knowledge, there is only one other study on TmEO from Spain [4], in which 1,8-cineole and, to a much lesser extent, linalool were reported to be the main components. However, the variability of the 1,8-cineole content in these TmEOs was higher than that described in the above study. Among the studies about TmEO obtained from plants grown in Portugal [2, 3, 7–11], one study [3] described a TmEO with 44% of 1,8-cineole and a higher concentration of camphor, borneol, camphene,  $\alpha$ -pinene and  $\alpha$ -terpineol than in our study. Other studies [2, 8] reported TmEOs with high percentages of 1,8-cineole, but in some cases, it was lower than the percentage of linalool and lower than the percentages described in this study. The composition of TmEOs can show high variability depending on the growing area [2]. Other TmEOs from Portugal [10] showed a TmEO composition with high concentrations of p-cymene,  $\gamma$ -terpinene, thymol and carvacrol. The last two compounds were not found in our TmEOs or in other studies. TmEOs from Italy [5] showed a similar composition to our study, with high concentrations of 1,8-cineole and linalool, followed by  $\alpha$ -pinene,  $\beta$ -pinene and  $\alpha$ -terpineol. Although all EOs were obtained from the same plant species, their compositions can be strongly influenced by physiological and genetic variations and environmental conditions [34].

Table 1. Fast gas chromatography determination of TmEO compounds.

| N <sup>a</sup> | LRI <sup>b</sup> | LRI <sup>f</sup> | Compound                   | Qualifying and quantitation ions <sup>d</sup><br>(m/z) | TmEO-1                         |                  | TmEO-2                         |                  | TmEO-3                         |                  | TmEO-4                         |                  | IM    |
|----------------|------------------|------------------|----------------------------|--------------------------------------------------------|--------------------------------|------------------|--------------------------------|------------------|--------------------------------|------------------|--------------------------------|------------------|-------|
|                |                  |                  |                            |                                                        | Concentration<br>(mmol/L ± SD) | Area<br>(% ± SD) | Concentration<br>(mmol/L ± SD) | Area<br>(% ± SD) | Concentration<br>(mmol/L ± SD) | Area<br>(% ± SD) | Concentration<br>(mmol/L ± SD) | Area<br>(% ± SD) |       |
| 1              | 928              | 927              | $\alpha$ -Thujene          | 77, 91, 93, 136                                        | 0.1f±0.0                       | 0.1e±0.0         |                                |                  |                                |                  |                                |                  | 1,2   |
| 2              | 930              | 936              | $\alpha$ -Pinene           | 77, 91, 93, 121                                        | 109.4c±0.2                     | 2.3g±0.0         | 128.0a±0.3                     | 2.9e±0.0         | 112.5b±0.8                     | 2.6f±0.0         | 65.6d±0.5                      | 1.4h±0.0         | 1,2,3 |
| 3              | 943              | 954              | Camphene                   | 79, 93, 121, 136                                       | 42.0a±0.4                      | 0.6f±0.0         | 31.2c±0.2                      | 0.5g±0.0         | 40.7b±0.7                      | 0.6e±0.0         | 10.3d±0.2                      | 0.1h±0.0         | 1,2,3 |
| 4              | 964              | 975              | Sabinene                   | 77, 91, 93, 136                                        | 103.8c±0.4                     | 1.6g±0.0         | 117.4a±0.7                     | 1.9e±0.0         | 105.1b±0.3                     | 1.8f±0.0         | 50.0d±0.3                      | 0.7h±0.0         | 1,2,3 |
| 5              | 970              | 983              | $\beta$ -Pinene            | 69, 79, 91, 93                                         | 169.4c±1.3                     | 2.9g±0.0         | 205.6a±0.8                     | 3.6e±0.0         | 176.5b±2.6                     | 3.2f±0.0         | 104.2d±0.5                     | 1.7h±0.0         | 1,2,3 |
| 6              | 979              | 989              | Myrcene                    | 41, 69, 93, 121                                        | 63.4a±1.5                      | 0.8e±0.0         | 62.7a±0.2                      | 0.9e±0.0         | 54.5b±0.6                      | 0.8f±0.0         | 35.4c±0.5                      | 0.4g±0.0         | 1,2,3 |
| 7              | 999              | 1008             | Phellandrene               | 77, 93, 119, 136                                       | 6.2b±0.2                       | tr               | 7.3a±0.6                       | tr               | 6.6ab±0.3                      | tr               | 2.3c±0.1                       | tr               | 1,2,3 |
| 8              | 1008             | 1017             | $\alpha$ -Terpinene        | 91, 93, 119, 121                                       | 20.5a±0.4                      | 0.3e±0.0         | 12.9b±0.4                      | 0.2f±0.0         | 12.4b±0.5                      | 0.2f±0.0         | 5.0c±0.1                       | 0.1g±0.0         | 1,2,3 |
| 9              | 1011             | 1024             | p-Cymene                   | 91, 117, 119, 121                                      | 15.4d±0.3                      | 0.4g±0.0         | 23.3a±0.5                      | 0.7e±0.0         | 18.9c±0.4                      | 0.6f±0.0         | 20.9b±0.1                      | 0.6f±0.0         | 1,2,3 |
| 10             | 1020             | 1030             | Limonene                   | 67, 68, 79, 93                                         | 110.0b±1.3                     | 2.2e±0.0         | 220.1a±9.3                     | 1.5g±0.2         | 228.7a±5.2                     | 1.9f±0.1         | 47.7c±0.4                      | 0.9h±0.0         | 1,2,3 |
| 11             | 1023             | 1035             | 1,8-Cineole                | 43, 81, 93, 108                                        | 2297.4c±41.1                   | 55.7g±0.2        | 2742.8a±39.0                   | 74.0e±0.2        | 2585.8b±2.2                    | 61.6f±0.0        | 1631.1d±29.2                   | 38.8h±0.1        | 1,2,3 |
| 12             | 1034             | 1042             | E- $\beta$ -Ocimene        | 79, 91, 93, 121,                                       |                                | 1.4e±0.0         |                                | 0.3h±0.0         |                                | 1.1f±0.0         |                                | 0.4g±0.0         | 1,2   |
| 13             | 1053             | 1056             | $\gamma$ -Terpinene        | 77, 91, 93, 119                                        | 32.9a±0.4                      | 0.5e±0.0         | 19.5b±0.5                      | 0.4f±0.0         | 19.5b±0.3                      | 0.4f±0.0         | 9.6c±0.0                       | 0.2g±0.0         | 1,2,3 |
| 14             | 1070             | 1070             | Sabinene hydrate           | 77, 91, 93, 121                                        | 10.0c±0.3                      | 0.2f±0.0         | 12.2b±0.6                      | 0.1g±0.0         | 12.8b±0.4                      | 0.2f±0.0         | 21.5a±0.7                      | 0.6e±0.0         | 1,2,3 |
| 15             | 1080             | 1087             | Terpinolene                | 91, 93, 121, 136                                       | 10.8a±0.2                      | 0.1e±0.0         | 8.2b±0.3                       | 0.1f±0.0         | 8.6b±0.2                       | 0.1e±0.0         | 5.0c±0.0                       | 0.1g±0.0         | 1,2,3 |
| 16             | 1081             | 1103             | Linalool                   | 41, 67, 69, 93                                         | 1168.3b±34.6                   | 18.5f±0.1        | 137.5d±4.1                     | 2.2h±0.0         | 901.4c±22.2                    | 13.3g±0.0        | 2357.9a±36.4                   | 42.7e±0.1        | 1,2,3 |
| 17             | 1089             | 1105             | Hotrienol                  | 71, 82, 91, 119                                        |                                | 0.5f±0.0         |                                | 0.1h±0.0         |                                | 0.3g±0.0         |                                | 1.1e±0.1         | 1,2   |
| 18             | 1148             | 1145             | Camphor                    | 81, 95, 108, 152                                       | 32.3a±0.2                      | 0.2e±0.0         | 18.1b±0.6                      | 0.1f±0.0         | 31.2a±0.3                      | 0.2e±0.0         | 9.4c±0.7                       | tr               | 1,2,3 |
| 19             | 1162             | 1168             | $\delta$ -Terpineol        | 41, 59, 79, 93                                         |                                | 0.9f±0.0         |                                | 1.0e±0.0         |                                | 0.9g±0.0         |                                | 0.8h±0.0         | 1,2   |
| 20             | 1174             | 1171             | Borneol                    | 79, 93, 95, 110                                        | 51.9a±1.3                      | 0.9e±0.0         | 40.2c±0.4                      | 0.6f±0.0         | 48.7b±1.1                      | 0.8e±0.0         | 14.0c±0.3                      | 0.1g±0.0         | 1,2,3 |
| 21             | 1176             | 1179             | Terpinen-4-ol              | 71, 86, 93, 111                                        | 45.1a±0.4                      | 0.9e±0.0         | 39.0b±1.0                      | 0.8f±0.0         | 40.5b±1.0                      | 0.9f±0.0         | 35.7c±0.5                      | 0.7g±0.0         | 1,2,3 |
| 22             | 1192             | 1197             | $\alpha$ -Terpineol        | 59, 67, 93, 121                                        | 181.7a±2.5                     | 3.1e±0.0         | 170.2b±0.8                     | 3.1e±0.0         | 155.1c±2.7                     | 2.8f±0.0         | 182.9a±1.6                     | 3.1e±0.0         | 1,2,3 |
| 23             | 1215             | 1227             | Nerol                      | 41, 69, 79, 93                                         |                                | 0.1f±0.0         |                                | 0.1f±0.0         |                                | tr               |                                | 0.1e±0.0         | 1,2   |
| 24             | 1237             | 1253             | Linalyl acetate            | 41, 69, 93, 80                                         | 59.2b±0.6                      | 1.0f±0.0         | 46.5c±0.6                      | 0.8g±0.0         | 43.4d±0.5                      | 0.7h±0.0         | 104.0a±0.9                     | 1.7e±0.0         | 1,2,3 |
| 25             | 1238             | 1256             | Geraniol                   | 41, 69, 93, 123                                        | 14.0b±0.7                      | 0.2f±0.0         | 9.2c±0.6                       | 0.1g±0.0         | 9.7c±0.4                       | 0.1g±0.0         | 20.0a±0.4                      | 0.3e±0.0         | 1,2,3 |
| 26             | 1285             | 1284             | Bornyl acetate             | 79, 93, 95, 121                                        | 13.9a±0.4                      | 0.2e±0.0         | 8.9c±0.2                       | 0.1f±0.0         | 13.2b±0.3                      | 0.2e±0.0         | 1.7d±0.0                       | tr               | 1,2,3 |
| 27             | 1342             | 1312             | Neryl acetate              | 79, 93, 107, 136                                       |                                | 0.2g±0.0         |                                | 0.4e±0.0         |                                | 0.3f±0.0         |                                |                  | 1,2   |
| 28             | 1350             | 1345             | $\alpha$ -Terpinyl acetate | 67, 68, 93, 121                                        | 47.0a±0.1                      | 0.8g±0.0         | 43.2b±0.5                      | 1.2e±0.0         | 38.1c±0.5                      | 1.1f±0.0         | 4.5d±0.0                       | 0.1h±0.0         | 1,2,3 |
| 29             | 1360             | 1378             | Geranyl acetate            | 41, 69, 93, 121                                        |                                | 0.3e±0.0         |                                | 0.1g±0.0         |                                | 0.2f±0.0         |                                | 0.2f±0.0         | 1,2   |
| 30             | 1412             | 1403             | $\alpha$ -Gurjunene        | 105, 119, 161, 204                                     |                                | tr               |                                | tr               |                                | 0.1e±0.0         |                                | tr               | 1,2   |
| 31             | 1421             | 1419             | E- $\beta$ -Caryophyllene  | 41, 91, 93, 133                                        | 108.7a ± 1.5                   | 0.8f ± 0.0       | 51.9c ± 0.2                    | 0.3h ± 0.0       | 111.0a ± 2.2                   | 0.8e ± 0.0       | 97.3b ± 2.2                    | 0.7g ± 0.0       | 1,2,3 |
| 32             | 1454             | 1459             | $\alpha$ -Humulene         | 80, 93, 121, 204                                       | 2.1b ± 0.0                     | tr               |                                |                  | 2.3a ± 0.0                     | 0.1e ± 0.0       | 1.9c ± 0.1                     | tr               | 1,2,3 |
| 33             | 1459             | 1463             | Aromadendrene              | 91, 105, 161, 189                                      |                                | 0.1e ± 0.0       |                                | 0.1f ± 0.0       |                                | 0.1e ± 0.0       |                                | 0.1f ± 0.0       | 1,2   |
| 34             | 1471             | 1481             | $\gamma$ -Muuroleone       | 105, 119, 161, 204                                     |                                | 0.1e ± 0.0       |                                | tr               |                                |                  |                                | 0.1f ± 0.0       | 1,2   |
| 35             | 1473             | 1490             | Viridiflorene              | 91, 105, 107, 161                                      | 13.0a ± 0.9                    | tr               | 9.4b ± 0.3                     | 0.1e ± 0.0       | 10.5ab ± 0.6                   | tr               | 11.4ab ± 1.7                   | 0.1e ± 0.0       | 1,2,3 |
| 36             | 1476             | 1494             | $\gamma$ -Gurjunene        | 91, 105, 161, 204                                      |                                | 0.3e ± 0.0       |                                | 0.1f ± 0.0       |                                | 0.2e ± 0.0       |                                | 0.1f ± 0.0       | 1,2   |
| 37             | 1494             | 1497             | $\alpha$ -Muuroleone       | 91, 93, 119, 161                                       |                                | tr               |                                | tr               |                                | tr               |                                | tr               | 1,2   |
| 38             | 1500             | 1508             | $\beta$ -Bisabolene        | 41, 69, 93, 204                                        |                                | tr               |                                | tr               |                                | tr               |                                | tr               | 1,2   |
| 39             | 1507             | 1511             | $\gamma$ -Cadinene         | 91, 105, 119, 161                                      |                                | 0.1e ± 0.0       |                                | tr               |                                | 0.1e ± 0.0       |                                | tr               | 1,2   |
| 40             | 1514             | 1517             | $\delta$ -Cadinene         | 91, 119, 134, 161                                      |                                | 0.1e ± 0.0       |                                | 0.1f ± 0.0       |                                | 0.1e ± 0.0       |                                | 0.1f ± 0.0       | 1,2   |

(Continued)

Table 1. (Continued)

| N <sup>a</sup> | LRI <sup>b</sup> | LRI <sup>c</sup> | Compound                   | Qualifying and quantitation ions <sup>d</sup><br>(m/z) | TmEO-1                         |                  | TmEO-2                         |                  | TmEO-3                         |                  | TmEO-4                         |                  | IM  |
|----------------|------------------|------------------|----------------------------|--------------------------------------------------------|--------------------------------|------------------|--------------------------------|------------------|--------------------------------|------------------|--------------------------------|------------------|-----|
|                |                  |                  |                            |                                                        | Concentration<br>(mmol/L ± SD) | Area<br>(% ± SD) | Concentration<br>(mmol/L ± SD) | Area<br>(% ± SD) | Concentration<br>(mmol/L ± SD) | Area<br>(% ± SD) | Concentration<br>(mmol/L ± SD) | Area<br>(% ± SD) |     |
| 41             | 1559             | 1556             | Geranyl butyrate           | 69, 93, 121, 136                                       |                                | tr               | tr                             |                  | tr                             |                  | tr                             |                  | 1,2 |
| 42             | 1569             | 1575             | Spathulenol                | 119, 131, 159, 187                                     |                                | 0.1g ± 0.0       | tr                             |                  | 0.1f ± 0.0                     |                  | 0.1e ± 0.0                     |                  | 1,2 |
| 43             | 1575             | 1581             | Caryophyllene oxide        | 41, 79, 91, 109                                        |                                | 0.1fg ± 0.0      | tr                             |                  | 0.1f ± 0.0                     |                  | 0.1e ± 0.0                     |                  | 1,2 |
| 44             | 1594             | 1594             | Viridiflorol               | 43, 109, 161, 204                                      |                                | 0.1ef ± 0.0      | 0.1ef ± 0.0                    |                  | 0.1f ± 0.0                     |                  | 0.1e ± 0.0                     |                  | 1,2 |
|                |                  |                  | Alcohol                    |                                                        |                                | 25.48            | 8.18                           |                  | 19.57                          |                  | 49.70                          |                  |     |
|                |                  |                  | Ketone                     |                                                        |                                | 0.17             | 0.10                           |                  | 0.18                           |                  | 0.00                           |                  |     |
|                |                  |                  | Ester                      |                                                        |                                | 2.66             | 2.65                           |                  | 2.61                           |                  | 2.10                           |                  |     |
|                |                  |                  | Ether                      |                                                        |                                | 55.72            | 73.25                          |                  | 61.65                          |                  | 38.87                          |                  |     |
|                |                  |                  | Monoterpene hydrocarbons   |                                                        |                                | 13.31            | 13.05                          |                  | 13.39                          |                  | 6.71                           |                  |     |
|                |                  |                  | Oxygenated monoterpenes    |                                                        |                                | 83.71            | 83.88                          |                  | 83.69                          |                  | 90.23                          |                  |     |
|                |                  |                  | Sesquiterpene hydrocarbons |                                                        |                                | 1.52             | 1.75                           |                  | 1.55                           |                  | 1.12                           |                  |     |
|                |                  |                  | Oxygenated sesquiterpenes  |                                                        |                                | 0.32             | 0.29                           |                  | 0.32                           |                  | 0.44                           |                  |     |
|                |                  |                  | Total terpene hydrocarbons |                                                        |                                | 14.83            | 14.79                          |                  | 14.94                          |                  | 7.83                           |                  |     |
|                |                  |                  | Total oxygenated terpenes  |                                                        |                                | 84.03            | 84.17                          |                  | 84.01                          |                  | 90.67                          |                  |     |

<sup>a</sup>Reference number for statistical PCA graphs.

<sup>b</sup>Linear Retention Index from data bases NIST 08 & Wiley 7.

<sup>c</sup>Linear Retention Index calculated from the homologous series of n-alkanes (C7-C30).

<sup>d</sup>Ions used for quantitation are in bold. IM = Identification method: 1 = by LRI, 2 = by NIST 08 & Wiley 7, 3 = by comparison with pure compounds. tr = Traces (<0.1%). Different letters next to numerical values, represent significant differences at p < 0.05 resulting from ANOVA plus HSD test.

<https://doi.org/10.1371/journal.pone.0190790.t001>



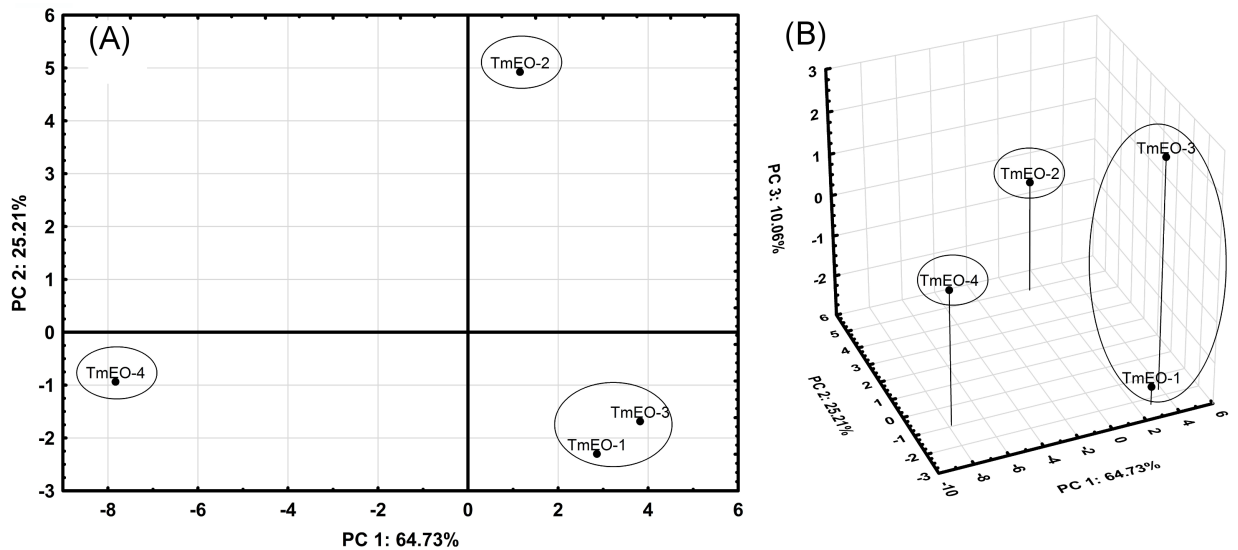

**Fig 1. PCA score plots.** (A) Score plot of PC2 vs. PC1. (–) tentative two-dimensional clustering. (B) 3D-Score plot of PC3 vs. PC2 and PC1. (–) tentative three-dimensional clustering. The loading plot of PC2 and PC1 (Fig 2) shows the “characteristic” compounds of each cluster. The loadings of compounds are standardized. A high load of a compound indicates that its presence (high or low percentage of the total area) is “characteristic” of that TmEO. TmEO-1 and -3 are characterized by the high proportion of 1,8-cineole (11), as well as the average level proportion of linalool (16). For their part,  $\beta$ -ocimene (12), E- $\beta$ -caryophyllene (31),  $\gamma$ -gurjunene (36) and  $\gamma$ -cadinene (39) are found in higher percentages in TmEO-1 and -3 than in the other TmEOs. TmEO-2 shows a characteristic high concentration of 1,8-cineole (11), and also of  $\beta$ -pinene (5), and  $\delta$ -terpineol (19). Characteristic compounds of TmEO-4 are the high proportion of linalool (16), hotrienol (17), linalyl acetate (24) and caryophyllene oxide (43). These qualitative data are useful to explain the quantitative similarities between the clusters considered in the AHC analysis.

<https://doi.org/10.1371/journal.pone.0190790.g001>

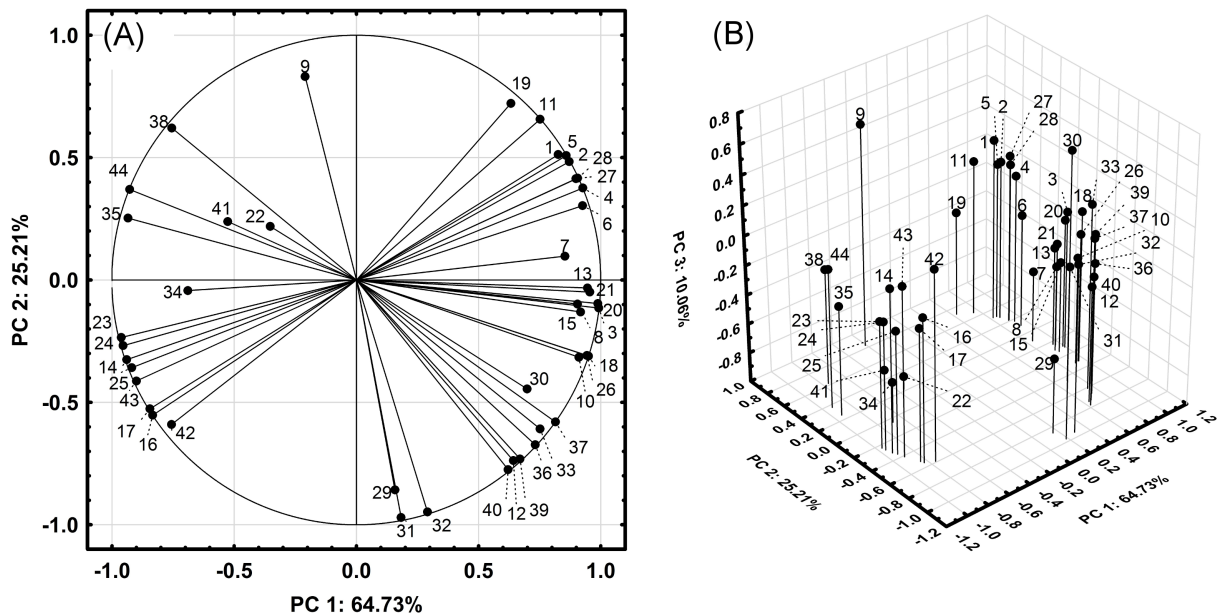

**Fig 2. PCA loading plots.** (A) Loading plot of PC2 vs. PC1. (B) 3D-loading plot of PC3 vs. PC2 and PC1.

<https://doi.org/10.1371/journal.pone.0190790.g002>

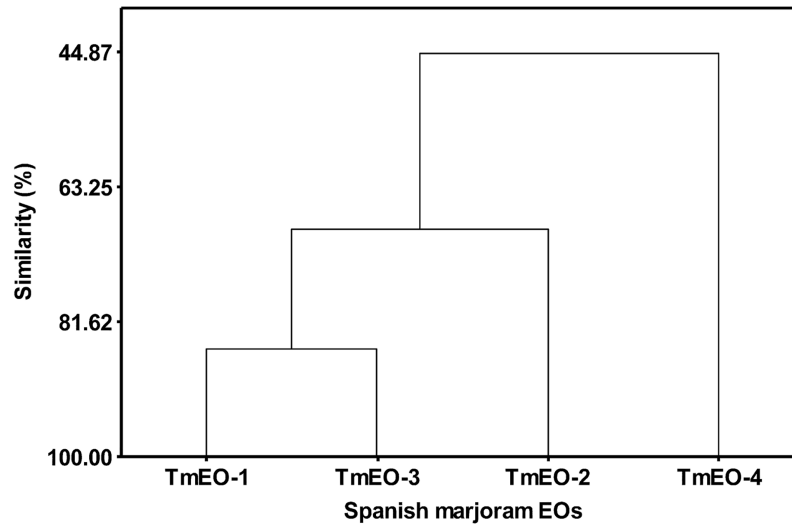

**Fig 3. AHC dendrogram.** Percentage of similarities between studied TmEOs and clusters.

<https://doi.org/10.1371/journal.pone.0190790.g003>

### International standard comparative

The compositions of these four TmEOs match the standards established by the International Organization for Standardization [46] (ISO) (Table 2). Only in the case of TmEO-2 was the concentration of linalool and β-caryophyllene slightly lower than the standard range, whereas the proportion of 1,8-cineole was higher than the standard range interval.

### EsGC-MS study

In the present study, the enantiomeric distributions of the commercially available compounds of these TmEOs were analyzed (Table 3 and S3 Fig). The (+)-enantiomer predominates in the case of α-pinene, limonene, sabinene hydrate, terpinen-4-ol, α-terpineol, α-terpinyl acetate

**Table 2. TmEO compositions compared with ISO standards.**

| Compound        | ISO standard <sup>a</sup> |             | TmEO-1 (%) | TmEO-2 (%) | TmEO-3 (%) | TmEO-4 (%) |
|-----------------|---------------------------|-------------|------------|------------|------------|------------|
|                 | minimum (%)               | maximum (%) |            |            |            |            |
| α-Pinene        | 1.0                       | 4.5         | 2.3        | 2.8        | 2.6        | 1.4        |
| β-Pinene        | 2.0                       | 5.0         | 2.9        | 3.6        | 3.2        | 1.7        |
| Limonene        | 1.0                       | 6.0         | 2.2        | 1.6        | 1.9        | 0.9        |
| 1,8-Cineole     | 30.0                      | 68.0        | 55.7       | 73.2       | 61.6       | 38.8       |
| Linalool        | 3.0                       | 48.0        | 18.5       | 2.1        | 13.3       | 42.7       |
| Camphor         | 0.1                       | 2.0         | 0.2        | 0.1        | 0.2        | tr         |
| δ-Terpineol     | 0.2                       | 2.0         | 0.9        | 0.9        | 0.9        | 0.8        |
| Borneol         | 0.1                       | 1.8         | 0.9        | 0.6        | 0.8        | 0.1        |
| Terpinen-4-ol   | 0.2                       | 1.2         | 0.9        | 0.8        | 0.9        | 0.7        |
| Linalyl acetate | 0.2                       | 4.0         | 1.0        | 0.8        | 0.7        | 1.7        |
| β-Caryophyllene | 0.5                       | 1.5         | 0.8        | 0.3        | 0.8        | 0.7        |
| α-Terpineol     | 1.0                       | 5.0         | 3.1        | 3.1        | 2.8        | 3.1        |

<sup>a</sup>ISO standard 4728 for Spanish wild marjoram (*Thymus mastichina* L.) [46].

<https://doi.org/10.1371/journal.pone.0190790.t002>

Table 3. Enantiomeric ratios of TmEO compounds<sup>a</sup>.

| t <sub>R</sub><br>(min) |       | Compound<br>(X)    | TmEO-1         |                | TmEO-2         |                | TmEO-3         |                | TmEO-4         |                |
|-------------------------|-------|--------------------|----------------|----------------|----------------|----------------|----------------|----------------|----------------|----------------|
| (+)-X                   | (-)-X |                    | (+)-[X]<br>(%) | (-)-[X]<br>(%) | (+)-[X]<br>(%) | (-)-[X]<br>(%) | (+)-[X]<br>(%) | (-)-[X]<br>(%) | (+)-[X]<br>(%) | (-)-[X]<br>(%) |
| 7.58                    | 7.36  | α-Pinene           | 83.7           | 16.3           | 87.1           | 12.9           | 85.0           | 15.0           | 87.1           | 12.9           |
| 8.47                    | 8.24  | Camphene           | <5.0           | >95.0          | <5.0           | >95.0          | <5.0           | >95.0          | <5.0           | >95.0          |
| 8.687                   | 8.934 | β-Pinene           | 50.0           | 50.0           | 49.9           | 50.1           | 50.0           | 50.0           | 49.9           | 50.1           |
| 10.27                   | 9.86  | Limonene           | >95.0          | <5.0           | >95.0          | <5.0           | >95.0          | <5.0           | >95.0          | <5.0           |
| 14.11                   | 14.36 | Sabinene hydrate   | >95.0          | <5.0           | >95.0          | <5.0           | >95.0          | <5.0           | >95.0          | <5.0           |
| 15.6                    | 15.33 | Linalool           | 6.2            | 93.8           | 47.4           | 52.6           | 6.8            | 93.2           | 47.3           | 52.7           |
| 16.26                   | 16.10 | Camphor            | <5.0           | >95.0          | <5.0           | >95.0          | <5.0           | >95.0          | <5.0           | >95.0          |
| 17.55                   | 17.80 | Bornyl acetate     | <5.0           | >95.0          | <5.0           | >95.0          | <5.0           | >95.0          | <5.0           | >95.0          |
| 18.13                   | 18.29 | Terpinen-4-ol      | 71.2           | 28.8           | 72.5           | 27.5           | 71.2           | 28.8           | 72.5           | 27.5           |
| 19.76                   | 19.31 | Borneol            | <5.0           | >95.0          | <5.0           | >95.0          | <5.0           | >95.0          | <5.0           | >95.0          |
| 19.85                   | 19.49 | α-Terpineol        | 65.5           | 34.5           | 67.4           | 32.6           | 67.7           | 32.3           | 67.4           | 32.6           |
| 20.91                   | 22.35 | α-Terpinyl acetate | >95.0          | <5.0           | >95.0          | <5.0           | >95.0          | <5.0           | >95.0          | <5.0           |
| 23.72                   | 23.53 | Aromadendrene      | >95.0          | <5.0           | >95.0          | <5.0           | >95.0          | <5.0           | >95.0          | <5.0           |
| -                       | 22.56 | β-Caryophyllene    | <5.0           | >95.0          | <5.0           | >95.0          | <5.0           | >95.0          | <5.0           | >95.0          |

<sup>a</sup>SD lower than ± 5%.

<https://doi.org/10.1371/journal.pone.0190790.t003>

and aromadendrene. The (-)-enantiomer is the most abundant in the case of camphene, linalool, camphor, bornyl acetate, borneol and β-caryophyllene. The enantiomeric distributions were similar for all compounds in all the TmEOs. The case of (-)-linalool was an exception: in TmEO-1 and -3 its concentration was nearly 90% of the area, whereas in TmEO-2 and -4 the concentration of (-)-linalool was nearly 50% of the area. To our knowledge, no similar enantiomeric determinations have been made for TmEOs.

### Antioxidant activity

The antioxidant activities of the TmEOs from Murcia and their main individual compounds have been evaluated using several complementary methods, as it is usual for the study of EOs from other plants and countries [6, 7, 34]. The capacities of the TmEOs and their compounds for scavenging of peroxy radicals (ORAC [35]), strong oxidant nitrogen radicals (ABTS [36]), weak oxidant nitrogen radicals (DPPH [37]), and lipidic peroxy radicals (TBARS [38]), as well as for chelating oxidant metal ions such as Fe<sup>2+</sup> (ChP [39]) have been determined. These assays could lead to different and complementary antioxidant activities that will be described and discussed below.

**ORAC.** The antioxidant activity was expressed in TEAC units (mg TE/g TmEO) and is reported in Table 4. The results can be ordered as follows: TmEO-4<sup>ORAC</sup> > TmEO-1<sup>ORAC</sup> > TmEO-3<sup>ORAC</sup> > TmEO-2<sup>ORAC</sup>. The antioxidant activity of individual compounds was assayed (Table 4) to determine which compounds were responsible for these differences between the TmEOs. According to the results, linalool, terpinen-4-ol, α-terpineol, linalyl acetate and β-caryophyllene were the best antioxidant compounds in this assay—the higher the linalool and linalyl acetate concentrations, the higher the antioxidant activity of the TmEOs. Higher antioxidant capacity was observed in a previous study [10] with a TmEO from Portugal, which contained thymol and carvacrol.

**ABTS.** The results of the ABTS method (Table 4) in TEAC units (mg TE/g TmEO) were as follows: TmEO-1<sup>ABTS</sup> > TmEO-3<sup>ABTS</sup> ≥ TmEO-2<sup>ABTS</sup> ≥ TmEO-4<sup>ABTS</sup>. As regards

**Table 4. Antioxidant capacity of TmEOs and their main individual compounds<sup>a</sup>.**

| TmEO/Compound    | ORAC<br>(mg TE/g X) | ABTS<br>(mg TE/g X) | DPPH<br>(mg TE/kg X) | TBARS<br>(mg BHTE/g X) | ChP<br>(mg EDTAE/g TmEO) |
|------------------|---------------------|---------------------|----------------------|------------------------|--------------------------|
| TmEO-1           | 485.1b ± 23.8       | 4.3a ± 0.1          | 53.5c ± 1.3          | 1.2a ± 0.2             | 0.6d ± 0.0               |
| TmEO-2           | 163.5d ± 8.8        | 0.9bc ± 0.0         | 61.3b ± 3.5          | 0.9a ± 0.2             | 1.6a ± 0.1               |
| TmEO-3           | 371.8c ± 15.1       | 1.0b ± 0.0          | 62.9b ± 2.3          | 1.2a ± 0.2             | 0.8c ± 0.0               |
| TmEO-4           | 735.1a ± 35.4       | 0.8c ± 0.1          | 76.1a ± 3.6          | 1.0a ± 0.2             | 1.0b ± 0.0               |
| α-Pinene         | N/D                 | N/D                 | 37.1 ± 3.4           | 4.2 ± 0.1              | 35.7 ± 2.4               |
| Camphene         | N/D                 | 0.2 ± 0.0           | N/D                  | N/D                    | 3.4 ± 0.3                |
| β-Pinene         | 50.9 ± 2.9          | 0.2 ± 0.0           | 16.3 ± 1.0           | 7.2 ± 0.5              | 3.9 ± 0.2                |
| Myrcene          | N/D                 | N/D                 | N/D                  | N/D                    | 5.3 ± 0.4                |
| α-Terpinene      | N/D                 | 7.3 ± 0.4           | 504.3 ± 21.6         | N/D                    | 133.4 ± 10.0             |
| p-Cymene         | N/D                 | 0.2 ± 0.0           | N/D                  | N/D                    | 43.2 ± 3.4               |
| Limonene         | 244.9 ± 20.6        | 1.1 ± 0.1           | N/D                  | N/D                    | 12.7 ± 0.8               |
| 1,8-Cineole      | N/D                 | N/D                 | N/D                  | N/D                    | 2.1 ± 0.1                |
| γ-Terpinene      | 304.6 ± 17.9        | 4.6 ± 0.2           | 607.0 ± 20.9         | 70.8 ± 6.3             | 0.7 ± 0.0                |
| Sabinene hydrate | 69.3 ± 5.4          | 0.8 ± 0.0           | N/D                  | 20.8 ± 0.9             | 12.7 ± 1.0               |
| Linalool         | 536.7 ± 28.2        | 0.1 ± 0.0           | N/D                  | N/D                    | 183.6 ± 11.1             |
| Camphor          | N/D                 | N/D                 | N/D                  | N/D                    | N/D                      |
| Borneol          | N/D                 | N/D                 | N/D                  | N/D                    | N/D                      |
| Terpinen-4-ol    | 601.5 ± 22.0        | 0.5 ± 0.0           | 73.8 ± 2.0           | 11.9 ± 2.5             | 3.2 ± 0.2                |
| α-Terpineol      | 523.8 ± 27.4        | 0.3 ± 0.0           | N/D                  | 3.7 ± 0.1              | 9.3 ± 0.6                |
| Linalyl acetate  | 255.5 ± 15.9        | 0.1 ± 0.0           | N/D                  | 4.8 ± 0.2              | 40.8 ± 3.1               |
| Bornyl acetate   | N/D                 | N/D                 | N/D                  | N/D                    | N/D                      |
| β-Caryophyllene  | 483.5 ± 17.7        | N/D                 | N/D                  | 18.6 ± 0.8             | 10.2 ± 0.7               |

<sup>a</sup>N/D = Activity lower than 0.05 units at a maximum assay concentration of 100 mmol/L. X = TmEO or compound. Different letters next to numerical values, represent significant differences at  $p < 0.05$  resulting from ANOVA plus HSD test.

<https://doi.org/10.1371/journal.pone.0190790.t004>

individual compounds (Table 4), α-terpinene and γ-terpinene showed the highest antioxidant activities in this method. TmEO-1 contained a higher concentration of both compounds, which may help explain the different activities of the TmEOs. A TmEO from Portugal [10] showed higher antioxidant activity in this method, probably due to the presence of thymol and carvacrol.

**DPPH.** The DPPH assay gave the following results (Table 4) in TEAC units (mg TE/kg TmEO):  $TmEO-4^{DPPH} > TmEO-3^{DPPH} \approx TmEO-2^{DPPH} > TmEO-1^{DPPH}$ . According to this method, α-terpinene and γ-terpinene showed the highest antioxidant activities when the compounds were tested individually. However, TmEO-4 has higher antioxidant activity than the others; hence, some synergistic or antagonistic effects may be occurring between the components [9, 47, 48].

The TmEOs studied here showed higher DPPH scavenging activity than those reported for TmEOs from other regions of Spain [4] and Portugal [3, 6].

**TBARS.** The results obtained after testing this method were as shown in Table 4 (mg BHTE/g TmEO):  $TmEO-3^{TBARS} \approx TmEO-1^{TBARS} \approx TmEO-4^{TBARS} \approx TmEO-2^{TBARS}$ . Several compounds are effective against lipid oxidation (Table 4), producing similar antioxidant activity to the TmEOs in this method.

Other studies [3, 6–8] with TmEOs from Portugal also measured the antioxidant activity by this method, and reported around 5–30% higher antioxidant activity than in our study. EOs

**Table 5. Antienzymatic activity of TmEOs and their individual compounds<sup>a</sup>.**

| TmEO/Compound  | LOX inhibition           |                    | AChE inhibition          |                    |
|----------------|--------------------------|--------------------|--------------------------|--------------------|
|                | IC <sub>50</sub> (µg/mL) | DI (%) [µg/mL]     | IC <sub>50</sub> (µg/mL) | DI (%) [µg/mL]     |
| TmEO-1         |                          | 56.7a ± 1.6 [150]  | 57.5c ± 2.8              |                    |
| TmEO-2         |                          | 46.3b ± 1.0 [150]  | 71.1b ± 3.1              |                    |
| TmEO-3         |                          | 40.8c ± 1.0 [150]  | 72.3b ± 2.0              |                    |
| TmEO-4         |                          | 47.6b ± 1.5 [150]  | 117.2a ± 5.6             |                    |
| α-Pinene       |                          | N/D                | 446.1 ± 7.9              |                    |
| Limonene       | 116.1 ± 3.3              |                    |                          | N/D                |
| 1,8-Cineole    |                          | 30.9 ± 1.1 [514.2] | 35.2 ± 1.5               |                    |
| Linalool       | 516.0 ± 6.8              |                    |                          | N/D                |
| Camphor        | 417.7 ± 13.0             |                    |                          | N/D                |
| Terpinen-4-ol  |                          | 29.6 ± 1.0 [514.2] |                          | 16.6 ± 0.9 [650.0] |
| α-Terpineol    |                          | 17.4 ± 0.2 [514.2] |                          | N/D                |
| Bornyl acetate | 74.5 ± 2.8               |                    |                          | N/D                |

<sup>a</sup>N/D = Activity not detected.

<https://doi.org/10.1371/journal.pone.0190790.t005>

from *Origanum vulgare* or *Thymbra capitata* [6] showed higher scavenging effect with lipid radicals than the EOs of this study, probably due to the presence of thymol and carvacrol in those EOs.

**Chelating power.** The measurement of the TmEO chelating power showed the following results (Table 4) expressed in mg EDTAE/g TmEO: TmEO-2<sup>ChP</sup> > TmEO-4<sup>ChP</sup> > TmEO-3<sup>ChP</sup> > TmEO-1<sup>ChP</sup>. There are several compounds with chelating power (Table 4), α-terpinene and linalool the most active being.

The results reported with this method are similar to those obtained with some TmEOs from Portugal [6]. However, other TmEOs from Portugal [3] did not show chelating activity, even though the concentration assayed was similar to that used in the present study.

### Antienzymatic activity

**LOX inhibitory activity.** The four TmEOs were tested at 150 µg/mL to calculate the DI (%). The results were as follows (Table 5): TmEO-1<sup>LOX</sup> > TmEO-4<sup>LOX</sup> ≈ TmEO-2<sup>LOX</sup> > TmEO-3<sup>LOX</sup>.

Similarly to the antioxidant methods, the enzymatic inhibition was explained by reference to the inhibition of the TmEO components. The IC<sub>50</sub> for bornyl acetate, limonene, camphor and linalool were calculated. However, other compounds did not reach 50% inhibition and so the DI at an equal concentration (514.2 µg/mL) is expressed (Table 5). The IC<sub>50</sub> obtained with NDGA was 102.6 ± 2.8 µg/mL.

Although linalool is not the best LOX inhibitor, it may contribute to TmEO-4 inhibition due to its high concentration.

The DI found in this study are higher than those previously reported for TmEOs from Portugal [31, 32] (IC<sub>50</sub> values of 0.7 ± 0.0 mg/mL and 1.1 ± 0.1 mg/mL, respectively). This activity may indicate antioxidant and anti-inflammatory capacity of TmEOs.

**AChE inhibition.** The IC<sub>50</sub> for AChE inhibition were as follows (µg/mL) (Table 5): TmEO-1<sup>AChE</sup> < TmEO-2<sup>AChE</sup> ≈ TmEO-3<sup>AChE</sup> < TmEO-4<sup>AChE</sup>.

After testing the inhibition of individual compounds, it was concluded that 1,8-cineole is the best AChE inhibitor with an IC<sub>50</sub> of 35.2 ± 1.5 µg/mL. Moreover, some other compounds

can inhibit AChE activity (Table 5). TmEO-1, -2 and -3 had higher amounts of 1,8-cineole than TmEO-4, so that, TmEO-4 showed a higher IC<sub>50</sub> than the others.

Galantamine was used as standard inhibitor (IC<sub>50</sub> = 0.16 ± 0.03 µg/mL).

The AChE inhibition of the TmEOs and 1,8-cineole was higher than that reported with EO from other plant species [49]. TmEO from Portugal [31, 32] showed similar AChE inhibition to that reported in this study. These results support the possible use of TmEOs as aid in the treatment of Alzheimer’s disease or in its prevention for people with family precedents.

### Antimicrobial activity

The TmEOs were tested against *P. aeruginosa*, *E. coli*, *S. aureus* and *C. albicans* using assay concentrations in the range of 0.2–18.8 mg/mL. *P. aeruginosa* could not be inhibited even with the highest tested concentration. The other microorganisms were inhibited with TmEO concentrations in the range of 2.3–9.4 mg/mL (Table 6), showing weak antimicrobial capacities, compared to those of the reference antimicrobials. In the case of *E. coli*, the most and least effective TmEOs were TmEO-4 and -2, respectively. Some individual compounds inhibited *E. coli* (Table 6); more specifically, the most influential compound in this respect was linalool, due to the high concentration found in TmEO-4. In the case of *S. aureus* and *C. albicans*, the differences between TmEOs were less pronounced. TmEO-4 produced a higher inhibition of *C. albicans* than the other TmEOs due to the high concentration of linalool. Similar MIC value for *Candida* was found previously using TmEO from Portugal [50], however, other studies

**Table 6. Antimicrobial capacity of TmEOs and main individual compounds.**

| TmEO <sup>a</sup> /Compound <sup>b</sup> | <i>Escherichia coli</i> |                        | <i>Staphylococcus aureus</i> |                        | <i>Candida albicans</i> |                        |
|------------------------------------------|-------------------------|------------------------|------------------------------|------------------------|-------------------------|------------------------|
|                                          | MIC (mg/mL)             | MBC (mg/mL)            | MIC (mg/mL)                  | MBC (mg/mL)            | MIC (mg/mL)             | MFC (mg/mL)            |
| TmEO-1                                   | 4.6                     | 4.6                    | 2.3                          | 4.6                    | 4.6                     | 4.6                    |
| TmEO-2                                   | 9.4                     | 9.4                    | 4.7                          | 4.7                    | 4.7                     | 4.7                    |
| TmEO-3                                   | 4.6                     | 4.6                    | 4.6                          | 4.6                    | 4.6                     | 4.6                    |
| TmEO-4                                   | 2.3                     | 2.3                    | 4.6                          | 4.6                    | 2.3                     | 2.3                    |
| α-Pinene                                 | 0.5                     | 1.0                    | 2.1                          | >2.1                   | 0.5                     | 0.5                    |
| Camphene                                 | >2.0                    | >2.0                   | >2.0                         | >2.0                   | >2.0                    | >2.0                   |
| Sabinene                                 | >2.0                    | >2.0                   | >2.0                         | >2.0                   | >2.0                    | >2.0                   |
| β-Pinene                                 | >2.0                    | >2.0                   | >2.0                         | >2.0                   | >2.0                    | >2.0                   |
| Myrcene                                  | >2.1                    | >2.1                   | >2.1                         | >2.1                   | >2.1                    | >2.1                   |
| p-Cymene                                 | 1.0                     | 2.0                    | >2.0                         | >2.0                   | 0.5                     | 0.5                    |
| Limonene                                 | 2.0                     | 2.0                    | 0.3                          | 0.3                    | 1.0                     | 1.0                    |
| 1,8-Cineole                              | >2.3                    | >2.3                   | >2.3                         | >2.3                   | >2.3                    | >2.3                   |
| γ-Terpinene                              | >2.0                    | >2.0                   | >2.0                         | >2.0                   | >2.0                    | >2.0                   |
| Sabinene hydrate                         | >2.3                    | >2.3                   | 2.3                          | 2.3                    | >2.3                    | >2.3                   |
| Linalool                                 | 1.1                     | 2.3                    | 0.6                          | 1.1                    | 2.3                     | 2.3                    |
| Borneol                                  | 1.1                     | 1.1                    | 0.3                          | 0.3                    | 0.6                     | 0.6                    |
| Terpinen-4-ol                            | 2.3                     | 2.3                    | 1.1                          | 2.3                    | >2.3                    | >2.3                   |
| α-Terpineol                              | 2.4                     | 2.4                    | 0.6                          | 1.1                    | >2.4                    | >2.4                   |
| Linalyl acetate                          | >3.0                    | >3.0                   | 3.0                          | >3.0                   | >3.0                    | >3.0                   |
| β-Caryophyllene                          | >3.1                    | >3.1                   | >3.1                         | >3.1                   | >3.1                    | >3.1                   |
| Streptomycin sulfate                     | 1.0 x 10 <sup>-3</sup>  | 1.0 x 10 <sup>-3</sup> | 1.0 x 10 <sup>-3</sup>       | 1.0 x 10 <sup>-3</sup> | NT                      | NT                     |
| Fluconazole                              | NT                      | NT                     | NT                           | NT                     | 4.0 x 10 <sup>-3</sup>  | 4.0 x 10 <sup>-3</sup> |

<sup>a</sup>NT = Not tested

<https://doi.org/10.1371/journal.pone.0190790.t006>



[51, 52] reported lower antibacterial activities of TmEOs than those found in this study. The EOs from other *Thymus* species showed lower MIC values, probably due to the high content of phenolic compounds, such as thymol and carvacrol [53, 54]. EOs obtained from other plant species showed lower or similar antimicrobial capacities [55, 56].

## Conclusions

This work has deepened our knowledge of four TmEOs from plants cultivated in the province of Murcia (Spain). Their compositions differ especially in the content of linalool and 1,8-cineole, whereas PCA and AHC identified three clusters. The proportions of their main enantiomers have been quantified. The concentrations of linalool, linalyl acetate,  $\alpha$ -terpinene and  $\gamma$ -terpinene determined the antioxidant activity of the TmEOs. Lipoxygenase and acetylcholinesterase activities were inhibited at low TmEO concentrations. Moreover, the TmEOs inhibit the growth of *E. coli*, *S. aureus* and *C. albicans* in the range of 2.3–9.4 mg/mL. These results support the potential applications of these TmEOs as natural ingredients in nutraceutical products.

## Supporting information

**S1 Fig. Mass spectra of 1,8-cineole.** Comparison between mass spectra of commercial and natural EO compounds.

(TIF)

**S2 Fig. Chromatogram of TmEO-1.** Main compounds are identified with different numbers.

(TIF)

**S3 Fig. Enantioselective chromatogram of TmEO-2.** The main dextrorotatory (+) and levorotatory (–) enantiomers are identified with different numbers.

(TIF)

**S4 Fig. Results obtained with TmEO using ORAC method.** Fluorescence decay curves corresponding to different concentrations of TmEO-4.

(TIF)

**S5 Fig. Determination of IC<sub>50</sub> of TmEOs and 1,8-cineole.** Kinetic analysis of enzyme inhibition data using non-linear regression.

(TIF)

**S1 Table. Calibration curve parameters to determine the absolute volatile concentrations of the TmEOs.**

(PDF)

## Acknowledgments

Some results have been reported in the PhD Thesis of one of the coauthors (ABC).

## Author Contributions

**Formal analysis:** Ana-Belen Cutillas, Alejandro Carrasco.

**Funding acquisition:** Virginia Tomas, Jose Tudela.

**Investigation:** Ana-Belen Cutillas, Alejandro Carrasco.

**Methodology:** Ramiro Martinez-Gutierrez, Virginia Tomas, Jose Tudela.

**Resources:** Ramiro Martinez-Gutierrez.

**Supervision:** Ramiro Martinez-Gutierrez, Virginia Tomas, Jose Tudela.

**Validation:** Virginia Tomas, Jose Tudela.

**Writing – original draft:** Ana-Belen Cutillas, Alejandro Carrasco.

**Writing – review & editing:** Ana-Belen Cutillas, Alejandro Carrasco.

## References

1. Mendez-Tovar I, Martin H, Santiago Y, Ibeas A, Herrero B, Asensio-S-Manzanera MC. Variation in morphological traits among *Thymus mastichina* (L.) L. populations. Genet Resour Crop Evol. 2015; 62(8):1257–67. <https://doi.org/10.1007/s10722-015-0229-3>
2. Salgueiro LR, Vila R, Tomas X, Canigual S, DaCunha AP, Adzet T. Composition and variability of the essential oils of *Thymus* species from section *Mastichina* from Portugal. Biochem Syst Ecol. 1997; 25(7):659–72. [https://doi.org/10.1016/s0305-1978\(97\)00046-x](https://doi.org/10.1016/s0305-1978(97)00046-x)
3. Bentes J, Miguel MG, Monteiro I, Costa M, Figueiredo AC, Barroso JG, et al. Antioxidant activities of the essential oils and extracts of portuguese *Thymbra capitata* and *Thymus mastichina*. Ital J Food Sci. 2009; 21(2):183–95.
4. Delgado T, Marinero P, Asensio-S-Manzanera MC, Asensio C, Herrero B, Pereira JA, et al. Antioxidant activity of twenty wild Spanish *Thymus mastichina* L. populations and its relation with their chemical composition. LWT-Food Sci Technol. 2014; 57(1):412–8. <https://doi.org/10.1016/j.lwt.2013.12.041>
5. Fraternali D, Giamperi L, Ricci D. Chemical composition and antifungal activity of essential oil obtained from *in vitro* plants of *Thymus mastichina* L. J Essent Oil Res. 2003; 15(4):278–81.
6. Galego L, Almeida V, Goncalves V, Costa M, Monteiro I, Matos F, et al. Antioxidant activity of the essential oils of *Thymbra capitata*, *Origanum vulgare*, *Thymus mastichina*, and *Calamintha baetica*. In: Gardner G, Craker LE, editors. Proceedings of the International Symposium on plants as food and medicine: the utilization and development of horticultural plants for human health. Acta Horticulturae. Leuven 1: International Society Horticultural Science; 2008. p. 325–33.
7. Miguel G, Simoes M, Figueiredo AC, Barroso JG, Pedro LG, Carvalho L. Composition and antioxidant activities of the essential oils of *Thymus caespitius*, *Thymus camphoratus* and *Thymus mastichina*. Food Chem. 2004; 86(2):183–8. <https://doi.org/10.1016/j.foodchem.2003.08.031>
8. Miguel MG, Costa LA, Figueiredo AC, Barroso JG, Pedro LG. Assessment of the antioxidant ability of *Thymus albicans*, *T. mastichina*, *T. camphoratus* and *T. carnosus* essential oils by TBARS and micellar model systems. Nat Prod Commun. 2007; 2(4):399–406.
9. Miguel MG, Falcato-Simoes M, Figueiredo AC, Barroso JMG, Pedro LG, Carvalho LM. Evaluation of the antioxidant activity of *Thymbra capitata*, *Thymus mastichina* and *Thymus camphoratus* essential oils. J Food Lipids. 2005; 12(3):181–97. <https://doi.org/10.1111/j.1745-4522.2005.00015.x>
10. Miguel MG, Gago C, Antunes MD, Megias C, Cortes-Giraldo I, Vioque J, et al. Antioxidant and antiproliferative activities of the essential oils from *Thymbra capitata* and *Thymus* species grown in Portugal. Evid-based Complement Altern Med. 2015. <https://doi.org/10.1155/2015/851721> PMID: 26229547
11. Moldao-Martins M, Beirao-da-Costa S, Neves C, Cavaleiro C, Salgueiro L, Beirao-da-Costa ML. Olive oil flavoured by the essential oils of *Mentha x piperita* and *Thymus mastichina* L. Food Qual Prefer. 2004; 15(5):447–52. <https://doi.org/10.1016/j.foodqual.2003.08.001>
12. Williams JD, Yazarians JA, Almeyda CC, Anderson KA, Boyce GR. Detection of the previously unobserved stereoisomers of thujone in the essential oil and consumable products of sage (*Salvia officinalis* L.) using headspace solid-phase microextraction-gas chromatography-mass spectrometry. J Agric Food Chem. 2016; 64(21):4319–26. <https://doi.org/10.1021/acs.jafc.6b01065> PMID: 27181395
13. Cheng BH, Lin CY, Yeh TF, Cheng SS, Chang ST. Potential source of S-(+)-linalool from *Cinnamomum osmophloeum* ct. linalool leaf: essential oil profile and enantiomeric purity. J Agric Food Chem. 2012; 60(31):7623–8. <https://doi.org/10.1021/jf302248w> PMID: 22769589
14. Aruoma OI. Free radicals, oxidative stress, and antioxidants in human health and disease. J Am Oil Chem Soc. 1998; 75(2):199–212. <https://doi.org/10.1007/s11746-998-0032-9>
15. Lu JM, Lin PH, Yao QZ, Chen CY. Chemical and molecular mechanisms of antioxidants: experimental approaches and model systems. J Cell Mol Med. 2010; 14(4):840–60. <https://doi.org/10.1111/j.1582-4934.2009.00897.x> PMID: 19754673

16. Mates JM, Segura JA, Alonso FJ, Marquez J. Anticancer antioxidant regulatory functions of phytochemicals. *Curr Med Chem*. 2011; 18(15):2315–38. <https://doi.org/10.1080/10420150.2011.611111> PMID: 21517750
17. Li R, Huang JQ, Kast J. Identification of total reversible cysteine oxidation in an atherosclerosis model using a modified biotin switch assay. *J Proteome Res*. 2015; 14(5):2026–35. <https://doi.org/10.1021/acs.jproteome.5b00133> PMID: 25767911
18. Lin SL, Ching LT, Lam K, Cheung PCK. Anti-angiogenic effect of water extract from the fruiting body of *Agrocybe aegerita*. *LWT-Food Sci Technol*. 2017; 75:155–63. <https://doi.org/10.1016/j.lwt.2016.08.044>
19. Abdelli M, Moghrani H, Aboun A, Maachi R. Algerian *Mentha pulegium* L. leaves essential oil: chemical composition, antimicrobial, insecticidal and antioxidant activities. *Ind Crop Prod*. 2016; 94:197–205. <https://doi.org/10.1016/j.indcrop.2016.08.042>
20. Mancini E, Senatore F, Del Monte D, De Martino L, Grulova D, Scognamiglio M, et al. Studies on chemical composition, antimicrobial and antioxidant activities of five *Thymus vulgaris* L. essential oils. *Molecules*. 2015; 20(7):12016–28. <https://doi.org/10.3390/molecules200712016> PMID: 26140436
21. Martins RL, Simoes RC, Rabelo ED, Farias ALF, Rodrigues ABL, Ramos RD, et al. Chemical composition, an antioxidant, cytotoxic and microbiological activity of the essential oil from the leaves of *Aeolanthus suaveolens* Mart. ex Spreng. *PLoS One*. 2016; 11(12):10. <https://doi.org/10.1371/journal.pone.0166684> PMID: 27907002
22. Yuan B, Xue LW, Zhang QY, Kong WW, Peng J, Kou M, et al. Essential oil from sweet potato vines, a potential new natural preservative, and an antioxidant on sweet potato tubers: assessment of the activity and the constitution. *J Agric Food Chem*. 2016; 64(40):7481–91. <https://doi.org/10.1021/acs.jafc.6b03175> PMID: 27624288
23. Vital ACP, Guerrero A, Monteschio JD, Valero MV, Carvalho CB, de Abreu BA, et al. Effect of edible and active coating (with rosemary and oregano essential oils) on beef characteristics and consumer acceptability. *PLoS One*. 2016; 11(8):15. <https://doi.org/10.1371/journal.pone.0160535> PMID: 27504957
24. Pidgeon GP, Lysaght J, Krishnamoorthy S, Reynolds JV, O'Byrne K, Nie D, et al. Lipoxygenase metabolism: roles in tumor progression and survival. *Cancer Metastasis Rev*. 2007; 26(3–4):503–24. <https://doi.org/10.1007/s10555-007-9098-3> PMID: 17943411
25. Luo Y, Kuang SN, Xue L, Yang JQ. The mechanism of 5-lipoxygenase in the impairment of learning and memory in rats subjected to chronic unpredictable mild stress. *Physiol Behav*. 2016; 167:145–53. <https://doi.org/10.1016/j.physbeh.2016.09.010> PMID: 27640130
26. Sadeghian H, Jabbari A. 15-Lipoxygenase inhibitors: a patent review. *Expert Opin Ther Patents*. 2016; 26(1):65–88. <https://doi.org/10.1517/13543776.2016.1113259> PMID: 26560362
27. Gade S, Rajamanikam M, Vadlapudi V, Nukala KM, Aluvala R, Giddigari C, et al. Acetylcholinesterase inhibitory activity of stigmasterol & hexacosanol is responsible for larvicidal and repellent properties of *Chromolaena odorata*. *Biochim Biophys Acta*. 2017; 1861(3):541–50. <https://doi.org/10.1016/j.bbagen.2016.11.044> PMID: 27916676.
28. Habartova K, Cahlikova L, Rezacova M, Havelek R. The biological activity of alkaloids from the Amaryllidaceae: from cholinesterases inhibition to anticancer activity. *Nat Prod Commun*. 2016; 11(10):1587–94.
29. Shrivastava SK, Srivastava P, Upendra TVR, Tripathi PN, Sinha SK. Design, synthesis and evaluation of some N-methylenebenzenamine derivatives as selective acetylcholinesterase (AChE) inhibitor and antioxidant to enhance learning and memory. *Bioorg Med Chem*. 2017; 25(4):1471–80. <https://doi.org/10.1016/j.bmc.2017.01.010> PMID: 28126439.
30. Tundis R, Bonesi M, Menichini F, Loizzo MR. Recent knowledge on medicinal plants as source of cholinesterase inhibitors for the treatment of dementia. *Mini-Rev Med Chem*. 2016; 16(8):605–18. <https://doi.org/10.2174/1389557515666150709104731> PMID: 26156548
31. Aazza S, El-Guendouz S, Miguel MG, Antunes MD, Faleiro ML, Correia AI, et al. Antioxidant, anti-inflammatory and anti-hyperglycaemic activities of essential oils from *Thymbra capitata*, *Thymus albi-cans*, *Thymus caespitius*, *Thymus carnosus*, *Thymus lotocephalus* and *Thymus mastichina* from Portugal. *Nat Prod Commun*. 2016; 11(7):1029–38.
32. Albano SM, Lima AS, Miguel MG, Pedro LG, Barroso JG, Figueiredo AC. Antioxidant, anti-5-lipoxygenase and antiacetylcholinesterase activities of essential oils and decoction waters of some aromatic plants. *Rec Nat Prod*. 2012; 6(1):35–48.
33. Rivas-Martínez S. Nociones sobre fitosociología, biogeografía y bioclimatología en la vegetación de España. (Notions about phytosociology, biogeography and bioclimatology in the plants of Spain). In: Peinado M., Rivas-Martínez S, editors. *La vegetación de España*. Madrid, Spain: University of Alcalá de Henares; 1987. p. 17–45.
34. Chaieb K, Hajjaoui H, Zmantar T, Ben Kahla-Nakbi A, Rouabhia M, Mahdouani K, et al. The chemical composition and biological activity of clove essential oil, *Eugenia caryophyllata* (*Syzygium aromaticum*

- L. Myrtaceae): A short review. *Phytother Res.* 2007; 21(6):501–6. <https://doi.org/10.1002/ptr.2124> PMID: 17380552
35. Ou BX, Hampsch-Woodill M, Prior RL. Development and validation of an improved oxygen radical absorbance capacity assay using fluorescein as the fluorescent probe. *J Agric Food Chem.* 2001; 49(10):4619–26. <https://doi.org/10.1021/jf010586o> PMID: 11599998
  36. Re R, Pellegrini N, Proteggente A, Pannala A, Yang M, Rice-Evans C. Antioxidant activity applying an improved ABTS radical cation decolorization assay. *Free Radic Biol Med.* 1999; 26(9–10):1231–7. [https://doi.org/10.1016/S0891-5849\(98\)00315-3](https://doi.org/10.1016/S0891-5849(98)00315-3) PMID: 10381194
  37. Brandwilliams W, Cuvelier ME, Berset C. Use of a free-radical method to evaluate antioxidant activity *Food Sci Technol-Lebensm-Wiss Technol.* 1995; 28(1):25–30. [https://doi.org/10.1016/S0023-6438\(95\)80008-5](https://doi.org/10.1016/S0023-6438(95)80008-5)
  38. Dorman HJD, Deans SG, Noble RC, Surai P. Evaluation *in vitro* of plant essential oils as natural antioxidants. *J Essent Oil Res.* 1995; 7(6):645–51. <https://doi.org/10.1080/10412905.1995.9700520>
  39. Miguel MG, Cruz C, Faleiro L, Simoes MTF, Figueiredo AC, Barroso JG, et al. *Foeniculum vulgare* essential oils: chemical composition, antioxidant and antimicrobial activities. *Nat Prod Commun.* 2010; 5(2):319–28. PMID: 20334152
  40. Christopher J, Pistorius E, Axelrod B. Isolation of an isozyme of soybean lipoxygenase. *Biochim Biophys Acta.* 1970; 198(1):12–9. [https://doi.org/10.1016/0005-2744\(70\)90028-8](https://doi.org/10.1016/0005-2744(70)90028-8) PMID: 5461103
  41. Ellman GL, Courtney KD, Andres V, Featherstone RM. A new and rapid colorimetric determination of acetylcholinesterase activity. *Biochem Pharmacol.* 1961; 7(2):88–95. [https://doi.org/10.1016/0006-2952\(61\)90145-9](https://doi.org/10.1016/0006-2952(61)90145-9)
  42. Systat. Sigma Plot: exact graphs and data analysis. San Jose: Systat Software; 2011.
  43. CLSI. Methods for dilution antimicrobial susceptibility tests for bacteria that grow aerobically; approved standard-tenth edition. CLSI document M07-A10. Clinical and Laboratory Standards Institute. 32. Wayne, PA2015.
  44. CLSI. Reference method for broth dilution antifungal susceptibility testing of yeast; approved standard-third edition. CLSI document M27-A3. Clinical and Laboratory Standards Institute. Wayne, PA2008.
  45. Manly BFJ, Navarro JA. Multivariate statistical methods. 4th ed. Boca Raton: CRC Press; 2017. <https://doi.org/10.1016/j.ymeth.2016.12.014> PMID: 28057585
  46. ISO. Oil of Spanish wild marjoram (*Thymus mastichina* L.). International Organization for Standardization. 2003;ISO 4728:2003.
  47. Almeida V, Goncalves V, Galego L, Miguel G, Costa M. Volatile constituents of leaves and flowers of *Thymus mastichina* by headspace solid-phase microextraction. In: Cervelli C, Ruffoni B, Guda CD, Minuto G, editors. Proceedings of the 1st International Symposium on the Labiatae: Advances in Production, Biotechnology and Utilisation. Acta Horticulturae. Leuven 1: International Society Horticultural Science; 2006. p. 239–42.
  48. Tak JH, Isman MB. Enhanced cuticular penetration as the mechanism of synergy for the major constituents of thyme essential oil in the cabbage looper, *Trichoplusia ni*. *Ind Crop Prod.* 2017; 101:29–35. <https://doi.org/10.1016/j.indcrop.2017.03.003>
  49. Aazza S, Lyoussi B, Miguel MG. Antioxidant and antiacetylcholinesterase activities of some commercial essential oils and their major compounds. *Molecules.* 2011; 16(9):7672–90. <https://doi.org/10.3390/molecules16097672> PMID: 21900869
  50. Pina-Vaz C, Rodrigues AG, Pinto E, Costa-de-Oliveira S, Tavares C, Salgueiro L, et al. Antifungal activity of *Thymus* oils and their major compounds. *J Eur Acad Dermatol Venereol.* 2004; 18(1):73–8. <https://doi.org/10.1111/j.1468-3083.2004.00886.x> PMID: 14678536
  51. Peñalver P, Huerta B, Borge C, Astorga R, Romero R, Perea A. Antimicrobial activity of five essential oils against origin strains of the *Enterobacteriaceae* family. *Apmis.* 2005; 113(1):1–6. <https://doi.org/10.1111/j.1600-0463.2005.apm1130101.x> PMID: 15676008
  52. Vieira M, Bessa LJ, Martins MR, Arantes S, Teixeira APS, Mendes A, et al. Chemical composition, antibacterial, antibiofilm and synergistic properties of essential oils from *Eucalyptus globulus* LABILL. and seven Mediterranean aromatic plants. *Chem Biodivers.* 2017; 14(6). <https://doi.org/10.1002/cbdv.201700006> PMID: 28281322
  53. Cosentino S, Tuberoso CIG, Pisano B, Satta M, Mascia V, Arzedi E, et al. *In-vitro* antimicrobial activity and chemical composition of Sardinian *Thymus* essential oils. *Lett Appl Microbiol.* 1999; 29(2):130–5. <https://doi.org/10.1046/j.1472-765X.1999.00605.x> PMID: 10499301
  54. Sokmen A, Gulluce M, Akpulat HA, Daferera D, Tepe B, Polissiou M, et al. The *in vitro* antimicrobial and antioxidant activities of the essential oils and methanol extracts of endemic *Thymus spathulifolius*. *Food Control.* 2004; 15(8):627–34. <https://doi.org/10.1016/j.foodcont.2003.10.005>

55. Diao WR, Hu QP, Feng SS, Li WQ, Xu JG. Chemical composition and antibacterial activity of the essential oil from green huajiao (*Zanthoxylum schinifolium*) against selected foodborne pathogens. J Agric Food Chem. 2013; 61(25):6044–9. <https://doi.org/10.1021/jf4007856> PMID: 23758080
56. Fatma G, Mouna BF, Mondher M, Ahmed L. *In-vitro* assessment of antioxidant and antimicrobial activities of methanol extracts and essential oil of *Thymus hirtus* sp. *algeriensis*. Lipids Health Dis. 2014; 13. <https://doi.org/10.1186/1476-511X-13-13> PMID: 24411003
