# Supplementary material for: Thymus mastichina L. essential oils from Murcia (Spain): Composition and antioxidant, antienzymatic and antimicrobial bioactivities
Source: PubMed Central journal article supplement (PMC5755899; doi:10.1371/journal.pone.0190790), 2018-01-05
Supplement: pone.0190790.s006.pdf [file pone.0190790.s006.pdf]

**S1 Table. Calibration curve parameters to determine the absolute volatile concentrations of the TmEOs.**

| Compound                        | Calibration curve <sup>a</sup>                      | R <sup>2</sup> | Calibration range (mM) | RSD (%) | LOD (mM) | LOQ (mM) | Standard source | Product reference |
|---------------------------------|-----------------------------------------------------|----------------|------------------------|---------|----------|----------|-----------------|-------------------|
| Nonane                          | Internal standard (MS 43 <sup>b</sup> , 57, 71, 85) |                |                        |         |          |          | SAFC            | 442694            |
| (-)- $\alpha$ -Pinene           | $y=1.241x-0.010$                                    | 0.999          | 16.76-0.25             | 0.25    | 0.025    | 0.076    | Fluka           | 80599             |
| (+)-Camphene                    | $y=0.587x-0.002$                                    | 0.999          | 18.49-0.28             | 1.15    | 0.054    | 0.165    | SAFC            | w222909           |
| Sabinene                        | $y=-0.869x+0.027$                                   | 0.999          | 16.31-0.61             | 2.73    | 0.091    | 0.277    | Extrasynthese   | 5062 S            |
| (-)- $\beta$ -Pinene            | $y=0.980x-0.013$                                    | 0.999          | 17.16-0.26             | 0.88    | 0.026    | 0.078    | Aldrich         | 112089            |
| Myrcene                         | $y=0.5940x-0.0307$                                  | 0.998          | 14.94-0.22             | 3.25    | 0.018    | 0.056    | Fluka           | 64643             |
| (-)-Phellandrene                | $y=0.395x-0.008$                                    | 0.999          | 15.87-0.60             | 2.10    | 0.106    | 0.322    | Aldrich         | 77429             |
| $\alpha$ -Terpinene             | $y=0.573x-0.018$                                    | 0.999          | 15.75-0.59             | 1.72    | 0.149    | 0.453    | Aldrich         | 86473             |
| p-Cymene                        | $y=2.580e-0.039$                                    | 0.999          | 16.59-0.25             | 0.08    | 0.010    | 0.030    | Aldrich         | c121452           |
| (+)-Limonene                    | $y=0.716x-0.018$                                    | 0.999          | 15.92-0.24             | 1.65    | 0.039    | 0.120    | Fluka           | 62118             |
| 1,8-Cineole                     | $y=0.356x+0.009$                                    | 0.999          | 15.92-0.60             | 2.70    | 0.164    | 0.497    | SAFC            | w246506           |
| $\gamma$ -Terpinene             | $y=0.976x-0.026$                                    | 0.999          | 16.46-0.25             | 0.72    | 0.020    | 0.062    | Aldrich         | 223190            |
| Sabinene hydrate                | $y=0.558x-0.024$                                    | 0.998          | 16.10-0.60             | 0.23    | 0.102    | 0.309    | Fluka           | 96573             |
| Terpinolene                     | $y=0.644x-0.009$                                    | 1.000          | 15.34-0.92             | 1.22    | 0.230    | 0.699    | SAFC            | W304603           |
| (-)-Linalool                    | $y=0.4378x-0.026$                                   | 0.997          | 14.66-0.55             | 1.53    | 0.102    | 0.309    | Fluka           | 74856             |
| Tetradecane                     | Internal standard (MS 43, 57 <sup>b</sup> , 71, 85) |                |                        |         |          |          | SAFC            | 442708            |
| (+)-Camphor                     | $y=0.2375x-0.038$                                   | 0.997          | 16.06-0.96             | 2.17    | 0.241    | 0.733    | Alfa Aesar      | A10708            |
| (-)-Borneol                     | $y=0.3820-0.056$                                    | 0.993          | 14.99-0.90             | 1.51    | 0.196    | 0.595    | Alfa Aesar      | A12684            |
| (-)-Terpinen-4-ol               | $y=0.3517x-0.012$                                   | 1.000          | 15.95-0.96             | 1.47    | 0.239    | 0.727    | Aldrich         | 11584             |
| (+)- $\alpha$ -Terpineol        | $y=0.218x+0.001$                                    | 1.000          | 16.45-0.99             | 3.59    | 0.247    | 0.750    | Fluka           | 83073             |
| Linalyl acetate                 | $y=0.263x-0.013$                                    | 0.998          | 11.97-1.80             | 3.03    | 0.449    | 1.365    | SAFC            | w263605           |
| Geraniol                        | $y=0.376x-0.023$                                    | 0.999          | 15.04-0.90             | 1.85    | 0.295    | 0.896    | SAFC            | w250716           |
| (-)-Bornyl acetate              | $y=0.380x+0.005$                                    | 0.999          | 13.59-0.82             | 3.25    | 0.204    | 0.620    | Fluka           | 45855             |
| (+)- $\alpha$ -Terpinyl acetate | $y=0.369x-0.009$                                    | 1.000          | 11.95-1.79             | 2.37    | 0.243    | 0.740    | Aldrich         | 86487             |
| Hexadecane                      | Internal standard (MS 41, 43, 57 <sup>b</sup> , 71) |                |                        |         |          |          | Fluka           | 52209             |
| (-)-E- $\beta$ -Caryophyllene   | $y=0.048x+0.002$                                    | 0.998          | 7.25-1.09              | 6.07    | 0.360    | 1.093    | Aldrich         | 22075             |
| $\alpha$ -Humulene              | $y=0.731x-0.043$                                    | 0.999          | 10.58-0.63             | 2.32    | 0.154    | 0.469    | Aldrich         | 53675             |
| Viridiflorene                   | $y=0.034x-0.001$                                    | 0.999          | 11.53-1.73             | 5.07    | 0.501    | 1.522    | Aldrich         | 61770             |

Each internal standard is the reference compound for the analytes that follow. <sup>a</sup>Response ratio vs. concentration ratio, internal standard correction applied. <sup>b</sup>Quantifier ion. RSD = Relative standard deviation. LOD = Limit of detection (signal/noise = 3). LOQ = Limit of quantitation (signal/noise = 10).
